# Supplementary material for: DJ‐1 is not a deglycase and makes a modest contribution to cellular defense against methylglyoxal damage in neurons
Source: PubMed Central journal article supplement — J Neurochem. 2022 Jul 2;162(3):245–61. doi: 10.1111/jnc.15656 (PMC9539984; doi:10.1111/jnc.15656), 2022-07-02
Supplement: JNC-162-245-s001.pdf [file JNC-162-245-s001.pdf]

**Supplementary Material for:**

**DJ-1 is not a deglycase and makes a modest contribution to cellular defense  
against methylglyoxal damage in neurons**

Melissa Conti Mazza<sup>\*1</sup>, Sarah C. Shuck<sup>\*2</sup>, Jiusheng Lin<sup>3</sup>, Michael Moxley<sup>4</sup>, John Termini<sup>2</sup>,  
Mark R. Cookson<sup>1</sup>, Mark A. Wilson<sup>3</sup>

1. Cell Biology and Gene Expression Section, National Institute on Aging, National Institutes of Health, Maryland, USA
2. Department of Molecular Medicine, Beckman Research Institute at City of Hope, Duarte, California, USA
3. Department of Biochemistry and Redox Biology Center, University of Nebraska, Lincoln, Nebraska, USA
4. Department of Chemistry, University of Nebraska at Kearney, Kearney, Nebraska, USA

\*These authors contributed equally to this work

To whom correspondence may be addressed: MRC: [cookson@mail.nih.gov](mailto:cookson@mail.nih.gov), JT: [jtermini@coh.org](mailto:jtermini@coh.org), MAW: [mwilson13@unl.edu](mailto:mwilson13@unl.edu)

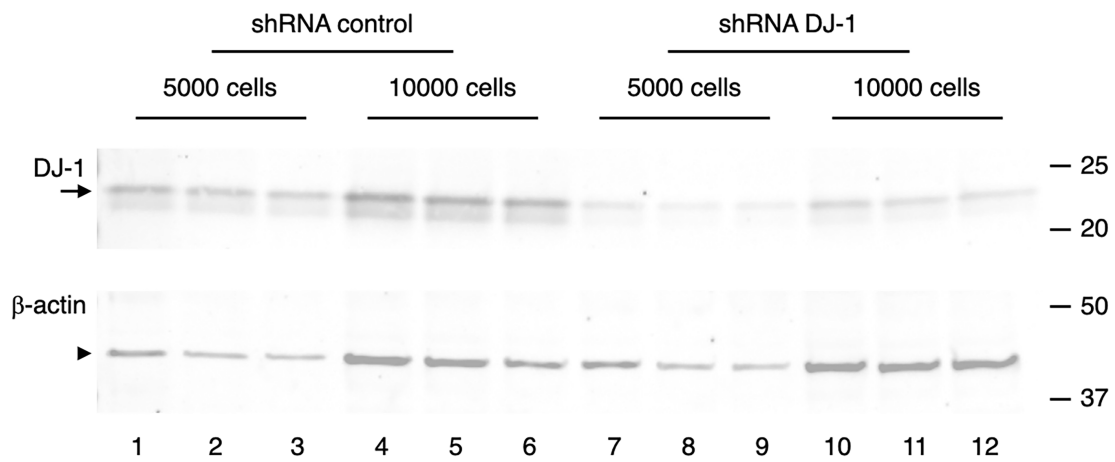

**Supplementary Fig. S1. Efficiency of shRNA DJ-1 knockdown in M17 cells.** Stable M17 cell lines transduced with control shRNA or DJ-1 shRNA were blotted for DJ-1 (upper panel, arrow) and  $\beta$ -actin (lower panel, arrowhead) and imaged on an LI-COR Odyssey imager. From left, lanes 1-6 show control shRNA cells seeded at 5,000 (lanes 1-3) or 10,000 (lanes 4-6) cells per well and lanes 7-12 show DJ-1 shRNA cells seeded at 5,000 (lanes 7-9) or 10,000 cells per well (lanes 10-12). Markers on the right of the blot are in kilodaltons.

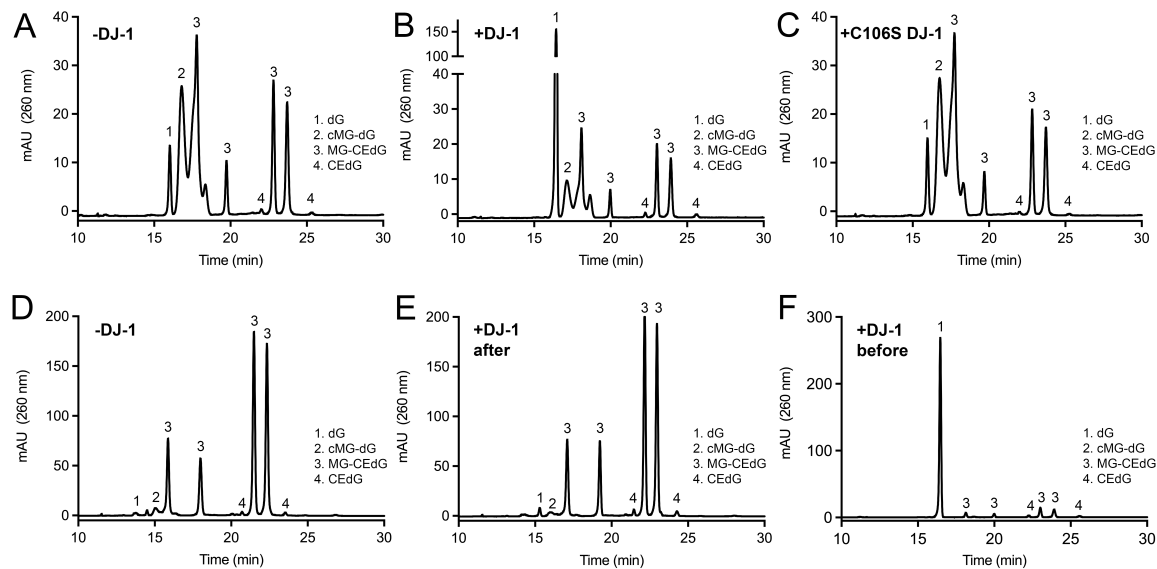

**Supplemental Figure S2. HPLC analysis of the effect of DJ-1 on dG glycation in vitro.** Raw HPLC elution profiles with peaks labeled by species are shown for all conditions in Fig 2A,B. In (E), “+DJ-1 after” is the result of adding DJ-1 after preincubation of MG and dG. In (F), “+DJ-1 before” is the result of adding DJ-1 at the same time and MG and dG.

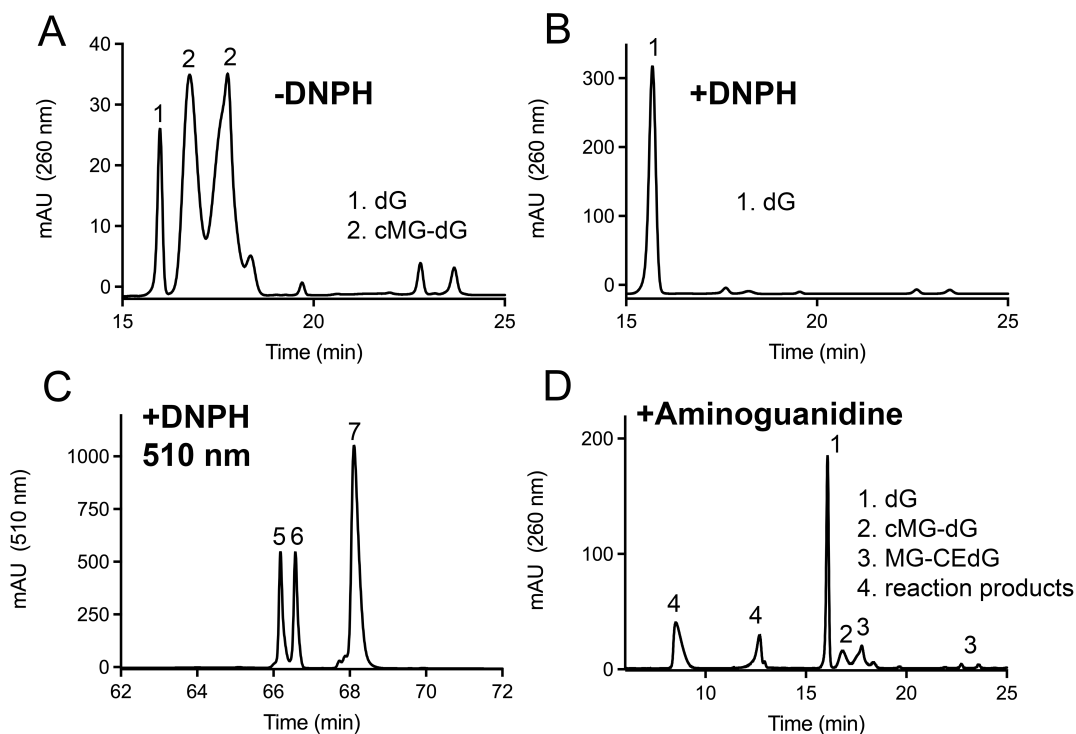

**Supplemental Figure S3. Aldehyde scavengers reduce glycation products similarly to DJ-1.** (A) HPLC elution profile of dG glycation by MG in the absence of DNPH. (B) Addition of DNPH with MG results in predominantly unmodified dG, similar to the effect of DJ-1 in Fig. 2A,B and Supplemental Fig. S1F. (C) Incubation of DNPH with MG creates several hydrazones (peaks 5,6, and 7) that absorb at 510 nm as described in (Gilbert & Brandt 1975). (D) Aminoguanidine has similar effects to DNPH (B) and DJ-1 (Fig. 2A,B and Supplemental Fig. S2F) on preventing dG glycation.

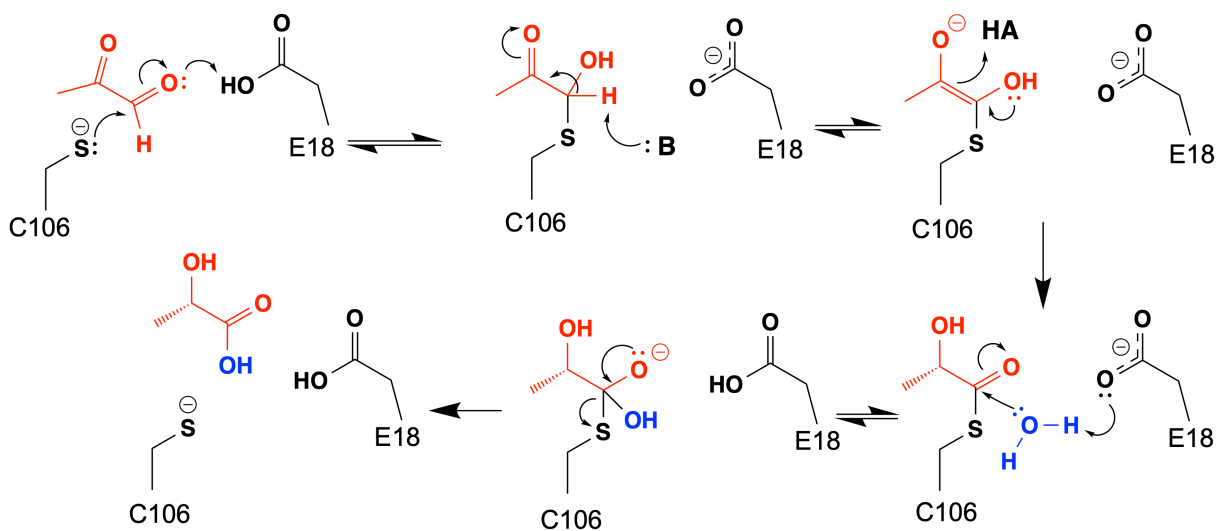

**Supplemental Figure S4. Proposed mechanism for DJ-1 glyoxalase activity.** Electron flow is shown with curved arrows, with MG in red and water in blue. Direction of the reaction is shown with straight arrows, with some steps presumed reversible shown in double arrows. We note that the identities of the general base B and the general acid HA are not known but may represent a protonation/deprotonation cycle of Glu18, although this is speculative.

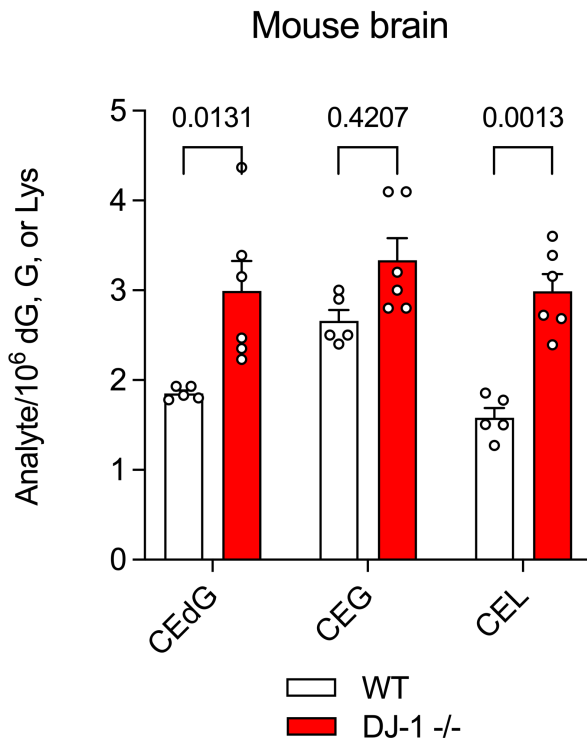

**Supplemental Figure S5. DJ-1 slightly decreases cellular concentrations of irreversible glycation products in whole mouse brain.** In all panels, isotope-dilution mass spectrometry was used to obtain relative concentrations of modified vs. unmodified dG, G, or Lys. Two-way ANOVA with multiple comparisons was used for statistical analysis using Šídák's test with p-values shown. Detailed two-way ANOVA values are shown in Supplemental Table S9. Small but consistent elevations in glycated products were observed in whole brains from DJ-1<sup>-/-</sup> mice compared to WT controls. Each measurement is shown as a circle with standard error of the mean shown in error bars.

We performed post hoc power calculations using the R package pwr2 with the function pwr.2way. Alpha was set at 0.05 and values of Cohen's f were derived from sum of squares in the respective two-way ANOVA calculated in Prism (GraphPad Software).

**Table S1. Power Analysis for Data in Figures 5, 6, and S5**

| Figure (sample)  | # groups Factor A | # groups, Factor B | n per group A | n per group B | f, factor A | f, factor B | Power        |
|------------------|-------------------|--------------------|---------------|---------------|-------------|-------------|--------------|
| 5A (M17)         | 3                 | 2                  | 3-6           | 3-6           | 1.41        | 0.65        | 1,0.965      |
| 5B (iPSC)        | 3                 | 2                  | 3-6           | 3-6           | 0.609       | 0.275       | 0.887, 0.359 |
| 5C (neurons)     | 3                 | 2                  | 3-4           | 3-4           | 0.893       | 0.474       | 0.96,0.6     |
| 6A (CEdG)        | 2                 | 2                  | 4             | 4             | 0.828       | 0.695       | 0.929,0.899  |
| 6B (CEG)         | 2                 | 2                  | 4             | 4             | 20.18       | 28.0        | 1,1          |
| 6C (CEL)         | 2                 | 2                  | 4             | 4             | 0.868       | 0.966       | 0.95,0.994   |
| S5 (mouse brain) | 3                 | 2                  | 5-6           | 5-6           | 0.673       | 1.17        | 0.941,0.999  |

We performed sample size stimulation using the R package pwr2 with the function ss.2way. Alpha was set at 0.05, beta as 0.2 (hence power = 0.8) and values of Cohen's f were derived from sum of squares in the respective two-way ANOVA calculated in Prism (GraphPad Software).

**Table S2. Sample Size Simulation for Data in Figures 5, 6, and S5**

| Figure (sample)  | # groups Factor A | # groups, Factor B | f, factor A | f, factor B | Total N for power = 0.8 | Actual N |
|------------------|-------------------|--------------------|-------------|-------------|-------------------------|----------|
| 5A (M17)         | 3                 | 2                  | 1.41        | 0.65        | 48                      | 40       |
| 5B (iPSC)        | 3                 | 2                  | 0.609       | 0.275       | 108                     | 39       |
| 5C (neurons)     | 3                 | 2                  | 0.893       | 0.474       | 42                      | 24       |
| 6A (CEdG)        | 2                 | 2                  | 0.828       | 0.695       | 20                      | 16       |
| 6B (CEG)         | 2                 | 2                  | 20.18       | 28.0        | 8                       | 16       |
| 6C (CEL)         | 2                 | 2                  | 0.868       | 0.966       | 16                      | 16       |
| S5 (mouse brain) | 3                 | 2                  | 0.673       | 1.17        | 30                      | 33       |

**Table S3. Two-way ANOVA details for Figure 5A (CEdG, CEG, CEL in M17 cells)**

|                                                   |                           |                       |                           |             |                  |    |        |       |
|---------------------------------------------------|---------------------------|-----------------------|---------------------------|-------------|------------------|----|--------|-------|
| Compare cell means regardless of rows and columns |                           |                       |                           |             |                  |    |        |       |
| Number of families                                | 1                         |                       |                           |             |                  |    |        |       |
| Number of comparisons per family                  | 15                        |                       |                           |             |                  |    |        |       |
| Alpha                                             | 0.05                      |                       |                           |             |                  |    |        |       |
| Tukey's multiple comparisons test                 | Predicted (LS) mean diff. | 95.00% CI of diff.    | Below threshold?          | Summary     | Adjusted P Value |    |        |       |
| CEdG:WT vs. CEdG:-DJ-1                            | -0.9075                   | -2.601 to 0.7864      | No                        | ns          | 0.5934           |    |        |       |
| CEdG:WT vs. CEG:WT                                | 0.4275                    | -1.266 to 2.121       | No                        | ns          | 0.9721           |    |        |       |
| CEdG:WT vs. CEG:-DJ-1                             | -0.3200                   | -2.014 to 1.374       | No                        | ns          | 0.9923           |    |        |       |
| CEdG:WT vs. CEL:WT                                | -2.492                    | -4.567 to -0.4179     | Yes                       | *           | 0.0110           |    |        |       |
| CEdG:WT vs. CEL:-DJ-1                             | -5.118                    | -7.193 to -3.044      | Yes                       | ****        | <0.0001          |    |        |       |
| CEdG:-DJ-1 vs. CEG:WT                             | 1.335                     | -0.3589 to 3.029      | No                        | ns          | 0.1923           |    |        |       |
| CEdG:-DJ-1 vs. CEG:-DJ-1                          | 0.5875                    | -1.106 to 2.281       | No                        | ns          | 0.8985           |    |        |       |
| CEdG:-DJ-1 vs. CEL:WT                             | -1.585                    | -3.660 to 0.4896      | No                        | ns          | 0.2196           |    |        |       |
| CEdG:-DJ-1 vs. CEL:-DJ-1                          | -4.211                    | -6.285 to -2.136      | Yes                       | ****        | <0.0001          |    |        |       |
| CEG:WT vs. CEG:-DJ-1                              | -0.7475                   | -2.441 to 0.9464      | No                        | ns          | 0.7655           |    |        |       |
| CEG:WT vs. CEL:WT                                 | -2.920                    | -4.995 to -0.8454     | Yes                       | **          | 0.0020           |    |        |       |
| CEG:WT vs. CEL:-DJ-1                              | -5.546                    | -7.620 to -3.471      | Yes                       | ****        | <0.0001          |    |        |       |
| CEG:-DJ-1 vs. CEL:WT                              | -2.172                    | -4.247 to -0.09786    | Yes                       | *           | 0.0357           |    |        |       |
| CEG:-DJ-1 vs. CEL:-DJ-1                           | -4.798                    | -6.873 to -2.724      | Yes                       | ****        | <0.0001          |    |        |       |
| CEL:WT vs. CEL:-DJ-1                              | -2.626                    | -5.021 to -0.2301     | Yes                       | *           | 0.0249           |    |        |       |
| Test details                                      | Predicted (LS) mean 1     | Predicted (LS) mean 2 | Predicted (LS) mean diff. | SE of diff. | N1               | N2 | q      | DF    |
| CEdG:WT vs. CEdG:-DJ-1                            | 1.993                     | 2.900                 | -0.9075                   | 0.5612      | 8                | 8  | 2.287  | 34.00 |
| CEdG:WT vs. CEG:WT                                | 1.993                     | 1.565                 | 0.4275                    | 0.5612      | 8                | 8  | 1.077  | 34.00 |
| CEdG:WT vs. CEG:-DJ-1                             | 1.993                     | 2.313                 | -0.3200                   | 0.5612      | 8                | 8  | 0.8064 | 34.00 |
| CEdG:WT vs. CEL:WT                                | 1.993                     | 4.485                 | -2.492                    | 0.6874      | 8                | 4  | 5.128  | 34.00 |
| CEdG:WT vs. CEL:-DJ-1                             | 1.993                     | 7.111                 | -5.118                    | 0.6874      | 8                | 4  | 10.53  | 34.00 |
| CEdG:-DJ-1 vs. CEG:WT                             | 2.900                     | 1.565                 | 1.335                     | 0.5612      | 8                | 8  | 3.364  | 34.00 |
| CEdG:-DJ-1 vs. CEG:-DJ-1                          | 2.900                     | 2.313                 | 0.5875                    | 0.5612      | 8                | 8  | 1.480  | 34.00 |
| CEdG:-DJ-1 vs. CEL:WT                             | 2.900                     | 4.485                 | -1.585                    | 0.6874      | 8                | 4  | 3.261  | 34.00 |
| CEdG:-DJ-1 vs. CEL:-DJ-1                          | 2.900                     | 7.111                 | -4.211                    | 0.6874      | 8                | 4  | 8.663  | 34.00 |
| CEG:WT vs. CEG:-DJ-1                              | 1.565                     | 2.313                 | -0.7475                   | 0.5612      | 8                | 8  | 1.884  | 34.00 |
| CEG:WT vs. CEL:WT                                 | 1.565                     | 4.485                 | -2.920                    | 0.6874      | 8                | 4  | 6.008  | 34.00 |
| CEG:WT vs. CEL:-DJ-1                              | 1.565                     | 7.111                 | -5.546                    | 0.6874      | 8                | 4  | 11.41  | 34.00 |
| CEG:-DJ-1 vs. CEL:WT                              | 2.313                     | 4.485                 | -2.172                    | 0.6874      | 8                | 4  | 4.470  | 34.00 |
| CEG:-DJ-1 vs. CEL:-DJ-1                           | 2.313                     | 7.111                 | -4.798                    | 0.6874      | 8                | 4  | 9.872  | 34.00 |
| CEL:WT vs. CEL:-DJ-1                              | 4.485                     | 7.111                 | -2.626                    | 0.7937      | 4                | 4  | 4.678  | 34.00 |



**Table S4: Two-way ANOVA details for Figure 5B (CEdG, CEG, CEL in iPSC cells)**

|                                                   |                           |                       |                           |             |                  |    |         |       |  |
|---------------------------------------------------|---------------------------|-----------------------|---------------------------|-------------|------------------|----|---------|-------|--|
| Compare cell means regardless of rows and columns |                           |                       |                           |             |                  |    |         |       |  |
| Number of families                                | 1                         |                       |                           |             |                  |    |         |       |  |
| Number of comparisons per family                  | 15                        |                       |                           |             |                  |    |         |       |  |
| Alpha                                             | 0.05                      |                       |                           |             |                  |    |         |       |  |
| Tukey's multiple comparisons test                 | Predicted (LS) mean diff. | 95.00% CI of diff.    | Below threshold?          | Summary     | Adjusted P Value |    |         |       |  |
| CEdG:WT vs. CEdG:-DJ-1                            | -1.043                    | -3.746 to 1.659       | No                        | ns          | 0.8489           |    |         |       |  |
| CEdG:WT vs. CEG:WT                                | 0.1918                    | -2.511 to 2.895       | No                        | ns          | >0.9999          |    |         |       |  |
| CEdG:WT vs. CEG:-DJ-1                             | -3.196                    | -5.898 to -0.4930     | Yes                       | *           | 0.0129           |    |         |       |  |
| CEdG:WT vs. CEL:WT                                | 0.2488                    | -3.061 to 3.559       | No                        | ns          | >0.9999          |    |         |       |  |
| CEdG:WT vs. CEL:-DJ-1                             | -1.833                    | -5.493 to 1.826       | No                        | ns          | 0.6576           |    |         |       |  |
| CEdG:-DJ-1 vs. CEG:WT                             | 1.235                     | -1.468 to 3.938       | No                        | ns          | 0.7373           |    |         |       |  |
| CEdG:-DJ-1 vs. CEG:-DJ-1                          | -2.152                    | -4.855 to 0.5504      | No                        | ns          | 0.1829           |    |         |       |  |
| CEdG:-DJ-1 vs. CEL:WT                             | 1.292                     | -2.018 to 4.602       | No                        | ns          | 0.8429           |    |         |       |  |
| CEdG:-DJ-1 vs. CEL:-DJ-1                          | -0.7898                   | -4.449 to 2.870       | No                        | ns          | 0.9858           |    |         |       |  |
| CEG:WT vs. CEG:-DJ-1                              | -3.388                    | -6.090 to -0.6848     | Yes                       | **          | 0.0074           |    |         |       |  |
| CEG:WT vs. CEL:WT                                 | 0.05700                   | -3.253 to 3.367       | No                        | ns          | >0.9999          |    |         |       |  |
| CEG:WT vs. CEL:-DJ-1                              | -2.025                    | -5.684 to 1.634       | No                        | ns          | 0.5583           |    |         |       |  |
| CEG:-DJ-1 vs. CEL:WT                              | 3.445                     | 0.1344 to 6.755       | Yes                       | *           | 0.0375           |    |         |       |  |
| CEG:-DJ-1 vs. CEL:-DJ-1                           | 1.363                     | -2.297 to 5.022       | No                        | ns          | 0.8672           |    |         |       |  |
| CEL:WT vs. CEL:-DJ-1                              | -2.082                    | -6.210 to 2.046       | No                        | ns          | 0.6513           |    |         |       |  |
| Test details                                      | Predicted (LS) mean 1     | Predicted (LS) mean 2 | Predicted (LS) mean diff. | SE of diff. | N1               | N2 | q       | DF    |  |
| CEdG:WT vs. CEdG:-DJ-1                            | 2.917                     | 3.960                 | -1.043                    | 0.8939      | 8                | 8  | 1.651   | 33.00 |  |
| CEdG:WT vs. CEG:WT                                | 2.917                     | 2.725                 | 0.1918                    | 0.8939      | 8                | 8  | 0.3035  | 33.00 |  |
| CEdG:WT vs. CEG:-DJ-1                             | 2.917                     | 6.113                 | -3.196                    | 0.8939      | 8                | 8  | 5.056   | 33.00 |  |
| CEdG:WT vs. CEL:WT                                | 2.917                     | 2.668                 | 0.2488                    | 1.095       | 8                | 4  | 0.3214  | 33.00 |  |
| CEdG:WT vs. CEL:-DJ-1                             | 2.917                     | 4.750                 | -1.833                    | 1.210       | 8                | 3  | 2.142   | 33.00 |  |
| CEdG:-DJ-1 vs. CEG:WT                             | 3.960                     | 2.725                 | 1.235                     | 0.8939      | 8                | 8  | 1.954   | 33.00 |  |
| CEdG:-DJ-1 vs. CEG:-DJ-1                          | 3.960                     | 6.113                 | -2.152                    | 0.8939      | 8                | 8  | 3.405   | 33.00 |  |
| CEdG:-DJ-1 vs. CEL:WT                             | 3.960                     | 2.668                 | 1.292                     | 1.095       | 8                | 4  | 1.669   | 33.00 |  |
| CEdG:-DJ-1 vs. CEL:-DJ-1                          | 3.960                     | 4.750                 | -0.7898                   | 1.210       | 8                | 3  | 0.9229  | 33.00 |  |
| CEG:WT vs. CEG:-DJ-1                              | 2.725                     | 6.113                 | -3.388                    | 0.8939      | 8                | 8  | 5.359   | 33.00 |  |
| CEG:WT vs. CEL:WT                                 | 2.725                     | 2.668                 | 0.05700                   | 1.095       | 8                | 4  | 0.07363 | 33.00 |  |
| CEG:WT vs. CEL:-DJ-1                              | 2.725                     | 4.750                 | -2.025                    | 1.210       | 8                | 3  | 2.366   | 33.00 |  |
| CEG:-DJ-1 vs. CEL:WT                              | 6.113                     | 2.668                 | 3.445                     | 1.095       | 8                | 4  | 4.450   | 33.00 |  |
| CEG:-DJ-1 vs. CEL:-DJ-1                           | 6.113                     | 4.750                 | 1.363                     | 1.210       | 8                | 3  | 1.592   | 33.00 |  |
| CEL:WT vs. CEL:-DJ-1                              | 2.668                     | 4.750                 | -2.082                    | 1.365       | 4                | 3  | 2.156   | 33.00 |  |

**Table S5: Two-way ANOVA details for Figure 5C (CEdG, CEG, CEL in mouse primary neurons)**

|                                                   |            |                    |                  |             |                  |    |         |       |
|---------------------------------------------------|------------|--------------------|------------------|-------------|------------------|----|---------|-------|
| Compare cell means regardless of rows and columns |            |                    |                  |             |                  |    |         |       |
| Number of families                                | 1          |                    |                  |             |                  |    |         |       |
| Number of comparisons per family                  | 15         |                    |                  |             |                  |    |         |       |
| Alpha                                             | 0.05       |                    |                  |             |                  |    |         |       |
| Tukey's multiple comparisons test                 | Mean Diff. | 95.00% CI of diff. | Below threshold? | Summary     | Adjusted P Value |    |         |       |
| CEdG:WT vs. CEdG:-DJ-1                            | -1.625     | -7.840 to 4.590    | No               | ns          | 0.9577           |    |         |       |
| CEdG:WT vs. CEG:WT                                | -2.475     | -8.690 to 3.740    | No               | ns          | 0.7991           |    |         |       |
| CEdG:WT vs. CEG:-DJ-1                             | -5.925     | -12.14 to 0.2897   | No               | ns          | 0.0668           |    |         |       |
| CEdG:WT vs. CEL:WT                                | 1.824      | -4.391 to 8.038    | No               | ns          | 0.9327           |    |         |       |
| CEdG:WT vs. CEL:-DJ-1                             | 0.09000    | -6.125 to 6.305    | No               | ns          | >0.9999          |    |         |       |
| CEdG:-DJ-1 vs. CEG:WT                             | -0.8500    | -7.065 to 5.365    | No               | ns          | 0.9977           |    |         |       |
| CEdG:-DJ-1 vs. CEG:-DJ-1                          | -4.300     | -10.51 to 1.915    | No               | ns          | 0.2854           |    |         |       |
| CEdG:-DJ-1 vs. CEL:WT                             | 3.449      | -2.766 to 9.663    | No               | ns          | 0.5111           |    |         |       |
| CEdG:-DJ-1 vs. CEL:-DJ-1                          | 1.715      | -4.500 to 7.930    | No               | ns          | 0.9473           |    |         |       |
| CEG:WT vs. CEG:-DJ-1                              | -3.450     | -9.665 to 2.765    | No               | ns          | 0.5107           |    |         |       |
| CEG:WT vs. CEL:WT                                 | 4.299      | -1.916 to 10.51    | No               | ns          | 0.2857           |    |         |       |
| CEG:WT vs. CEL:-DJ-1                              | 2.565      | -3.650 to 8.780    | No               | ns          | 0.7751           |    |         |       |
| CEG:-DJ-1 vs. CEL:WT                              | 7.749      | 1.534 to 13.96     | Yes              | **          | 0.0100           |    |         |       |
| CEG:-DJ-1 vs. CEL:-DJ-1                           | 6.015      | -0.1997 to 12.23   | No               | ns          | 0.0611           |    |         |       |
| CEL:WT vs. CEL:-DJ-1                              | -1.734     | -7.948 to 4.481    | No               | ns          | 0.9449           |    |         |       |
| Test details                                      | Mean 1     | Mean 2             | Mean Diff.       | SE of diff. | N1               | N2 | q       | DF    |
| CEdG:WT vs. CEdG:-DJ-1                            | 3.500      | 5.125              | -1.625           | 1.956       | 4                | 4  | 1.175   | 18.00 |
| CEdG:WT vs. CEG:WT                                | 3.500      | 5.975              | -2.475           | 1.956       | 4                | 4  | 1.790   | 18.00 |
| CEdG:WT vs. CEG:-DJ-1                             | 3.500      | 9.425              | -5.925           | 1.956       | 4                | 4  | 4.285   | 18.00 |
| CEdG:WT vs. CEL:WT                                | 3.500      | 1.676              | 1.824            | 1.956       | 4                | 4  | 1.319   | 18.00 |
| CEdG:WT vs. CEL:-DJ-1                             | 3.500      | 3.410              | 0.09000          | 1.956       | 4                | 4  | 0.06509 | 18.00 |
| CEdG:-DJ-1 vs. CEG:WT                             | 5.125      | 5.975              | -0.8500          | 1.956       | 4                | 4  | 0.6147  | 18.00 |
| CEdG:-DJ-1 vs. CEG:-DJ-1                          | 5.125      | 9.425              | -4.300           | 1.956       | 4                | 4  | 3.110   | 18.00 |
| CEdG:-DJ-1 vs. CEL:WT                             | 5.125      | 1.676              | 3.449            | 1.956       | 4                | 4  | 2.494   | 18.00 |
| CEdG:-DJ-1 vs. CEL:-DJ-1                          | 5.125      | 3.410              | 1.715            | 1.956       | 4                | 4  | 1.240   | 18.00 |
| CEG:WT vs. CEG:-DJ-1                              | 5.975      | 9.425              | -3.450           | 1.956       | 4                | 4  | 2.495   | 18.00 |
| CEG:WT vs. CEL:WT                                 | 5.975      | 1.676              | 4.299            | 1.956       | 4                | 4  | 3.109   | 18.00 |
| CEG:WT vs. CEL:-DJ-1                              | 5.975      | 3.410              | 2.565            | 1.956       | 4                | 4  | 1.855   | 18.00 |
| CEG:-DJ-1 vs. CEL:WT                              | 9.425      | 1.676              | 7.749            | 1.956       | 4                | 4  | 5.604   | 18.00 |
| CEG:-DJ-1 vs. CEL:-DJ-1                           | 9.425      | 3.410              | 6.015            | 1.956       | 4                | 4  | 4.350   | 18.00 |
| CEL:WT vs. CEL:-DJ-1                              | 1.676      | 3.410              | -1.734           | 1.956       | 4                | 4  | 1.254   | 18.00 |

**Table S6: Two-way ANOVA details for Figure 6A (CEdG in M17 cells, BSO vs. vehicle)**

|                                                   |            |                    |                  |             |                  |    |        |       |  |
|---------------------------------------------------|------------|--------------------|------------------|-------------|------------------|----|--------|-------|--|
| Compare cell means regardless of rows and columns |            |                    |                  |             |                  |    |        |       |  |
| Number of families                                | 1          |                    |                  |             |                  |    |        |       |  |
| Number of comparisons per family                  | 6          |                    |                  |             |                  |    |        |       |  |
| Alpha                                             | 0.05       |                    |                  |             |                  |    |        |       |  |
| Tukey's multiple comparisons test                 | Mean Diff. | 95.00% CI of diff. | Below threshold? | Summary     | Adjusted P Value |    |        |       |  |
| Vehicle:Control shRNA vs. Vehicle:DJ-1 shRNA      | -0.2073    | -0.8115 to 0.3970  | No               | ns          | 0.7423           |    |        |       |  |
| Vehicle:Control shRNA vs. BSO:Control shRNA       | -0.1583    | -0.7625 to 0.4460  | No               | ns          | 0.8631           |    |        |       |  |
| Vehicle:Control shRNA vs. BSO:DJ-1 shRNA          | -0.9148    | -1.519 to -0.3105  | Yes              | **          | 0.0035           |    |        |       |  |
| Vehicle:DJ-1 shRNA vs. BSO:Control shRNA          | 0.04900    | -0.5553 to 0.6533  | No               | ns          | 0.9948           |    |        |       |  |
| Vehicle:DJ-1 shRNA vs. BSO:DJ-1 shRNA             | -0.7075    | -1.312 to -0.1032  | Yes              | *           | 0.0206           |    |        |       |  |
| BSO:Control shRNA vs. BSO:DJ-1 shRNA              | -0.7565    | -1.361 to -0.1522  | Yes              | *           | 0.0135           |    |        |       |  |
| Test details                                      | Mean 1     | Mean 2             | Mean Diff.       | SE of diff. | N1               | N2 | q      | DF    |  |
| Vehicle:Control shRNA vs. Vehicle:DJ-1 shRNA      | 0.9353     | 1.143              | -0.2073          | 0.2035      | 4                | 4  | 1.440  | 12.00 |  |
| Vehicle:Control shRNA vs. BSO:Control shRNA       | 0.9353     | 1.094              | -0.1583          | 0.2035      | 4                | 4  | 1.100  | 12.00 |  |
| Vehicle:Control shRNA vs. BSO:DJ-1 shRNA          | 0.9353     | 1.850              | -0.9148          | 0.2035      | 4                | 4  | 6.356  | 12.00 |  |
| Vehicle:DJ-1 shRNA vs. BSO:Control shRNA          | 1.143      | 1.094              | 0.04900          | 0.2035      | 4                | 4  | 0.3405 | 12.00 |  |
| Vehicle:DJ-1 shRNA vs. BSO:DJ-1 shRNA             | 1.143      | 1.850              | -0.7075          | 0.2035      | 4                | 4  | 4.916  | 12.00 |  |
| BSO:Control shRNA vs. BSO:DJ-1 shRNA              | 1.094      | 1.850              | -0.7565          | 0.2035      | 4                | 4  | 5.257  | 12.00 |  |

**Table S7: Two-way ANOVA details for Figure 6B (CEG in M17 cells, BSO vs. vehicle)**

|                                                   |            |                    |                  |             |                  |    |        |       |  |
|---------------------------------------------------|------------|--------------------|------------------|-------------|------------------|----|--------|-------|--|
| Compare cell means regardless of rows and columns |            |                    |                  |             |                  |    |        |       |  |
| Number of families                                | 1          |                    |                  |             |                  |    |        |       |  |
| Number of comparisons per family                  | 6          |                    |                  |             |                  |    |        |       |  |
| Alpha                                             | 0.05       |                    |                  |             |                  |    |        |       |  |
| Tukey's multiple comparisons test                 | Mean Diff. | 95.00% CI of diff. | Below threshold? | Summary     | Adjusted P Value |    |        |       |  |
| Vehicle:Control shRNA vs. Vehicle:DJ-1 shRNA      | -0.2500    | -2.977 to 2.477    | No               | ns          | 0.9926           |    |        |       |  |
| Vehicle:Control shRNA vs. BSO:Control shRNA       | -0.5500    | -3.277 to 2.177    | No               | ns          | 0.9305           |    |        |       |  |
| Vehicle:Control shRNA vs. BSO:DJ-1 shRNA          | -3.425     | -6.152 to -0.6984  | Yes              | *           | 0.0132           |    |        |       |  |
| Vehicle:DJ-1 shRNA vs. BSO:Control shRNA          | -0.3000    | -3.027 to 2.427    | No               | ns          | 0.9874           |    |        |       |  |
| Vehicle:DJ-1 shRNA vs. BSO:DJ-1 shRNA             | -3.175     | -5.902 to -0.4484  | Yes              | *           | 0.0213           |    |        |       |  |
| BSO:Control shRNA vs. BSO:DJ-1 shRNA              | -2.875     | -5.602 to -0.1484  | Yes              | *           | 0.0378           |    |        |       |  |
| Test details                                      | Mean 1     | Mean 2             | Mean Diff.       | SE of diff. | N1               | N2 | q      | DF    |  |
| Vehicle:Control shRNA vs. Vehicle:DJ-1 shRNA      | 3.375      | 3.625              | -0.2500          | 0.9184      | 4                | 4  | 0.3850 | 12.00 |  |
| Vehicle:Control shRNA vs. BSO:Control shRNA       | 3.375      | 3.925              | -0.5500          | 0.9184      | 4                | 4  | 0.8469 | 12.00 |  |
| Vehicle:Control shRNA vs. BSO:DJ-1 shRNA          | 3.375      | 6.800              | -3.425           | 0.9184      | 4                | 4  | 5.274  | 12.00 |  |
| Vehicle:DJ-1 shRNA vs. BSO:Control shRNA          | 3.625      | 3.925              | -0.3000          | 0.9184      | 4                | 4  | 0.4620 | 12.00 |  |
| Vehicle:DJ-1 shRNA vs. BSO:DJ-1 shRNA             | 3.625      | 6.800              | -3.175           | 0.9184      | 4                | 4  | 4.889  | 12.00 |  |
| BSO:Control shRNA vs. BSO:DJ-1 shRNA              | 3.925      | 6.800              | -2.875           | 0.9184      | 4                | 4  | 4.427  | 12.00 |  |

**Table S8: Two-way ANOVA details for Figure 6C (CEL in M17 cells, BSO vs. vehicle)**

| Compare cell means regardless of rows and columns |            |                    |                  |             |                  |    |       |       |
|---------------------------------------------------|------------|--------------------|------------------|-------------|------------------|----|-------|-------|
| Number of families                                | 1          |                    |                  |             |                  |    |       |       |
| Number of comparisons per family                  | 6          |                    |                  |             |                  |    |       |       |
| Alpha                                             | 0.05       |                    |                  |             |                  |    |       |       |
| Tukey's multiple comparisons test                 | Mean Diff. | 95.00% CI of diff. | Below threshold? | Summary     | Adjusted P Value |    |       |       |
| Vehicle:Control shRNA vs. Vehicle:DJ-1 shRNA      | -0.6150    | -1.291 to 0.06127  | No               | ns          | 0.0792           |    |       |       |
| Vehicle:Control shRNA vs. BSO:Control shRNA       | -8.880     | -9.556 to -8.204   | Yes              | ****        | <0.0001          |    |       |       |
| Vehicle:Control shRNA vs. BSO:DJ-1 shRNA          | -14.17     | -14.85 to -13.50   | Yes              | ****        | <0.0001          |    |       |       |
| Vehicle:DJ-1 shRNA vs. BSO:Control shRNA          | -8.265     | -8.941 to -7.589   | Yes              | ****        | <0.0001          |    |       |       |
| Vehicle:DJ-1 shRNA vs. BSO:DJ-1 shRNA             | -13.56     | -14.23 to -12.88   | Yes              | ****        | <0.0001          |    |       |       |
| BSO:Control shRNA vs. BSO:DJ-1 shRNA              | -5.293     | -5.969 to -4.616   | Yes              | ****        | <0.0001          |    |       |       |
| Test details                                      | Mean 1     | Mean 2             | Mean Diff.       | SE of diff. | N1               | N2 | q     | DF    |
| Vehicle:Control shRNA vs. Vehicle:DJ-1 shRNA      | 2.435      | 3.050              | -0.6150          | 0.2278      | 4                | 4  | 3.818 | 12.00 |
| Vehicle:Control shRNA vs. BSO:Control shRNA       | 2.435      | 11.32              | -8.880           | 0.2278      | 4                | 4  | 55.13 | 12.00 |
| Vehicle:Control shRNA vs. BSO:DJ-1 shRNA          | 2.435      | 16.61              | -14.17           | 0.2278      | 4                | 4  | 87.99 | 12.00 |
| Vehicle:DJ-1 shRNA vs. BSO:Control shRNA          | 3.050      | 11.32              | -8.265           | 0.2278      | 4                | 4  | 51.31 | 12.00 |
| Vehicle:DJ-1 shRNA vs. BSO:DJ-1 shRNA             | 3.050      | 16.61              | -13.56           | 0.2278      | 4                | 4  | 84.17 | 12.00 |
| BSO:Control shRNA vs. BSO:DJ-1 shRNA              | 11.32      | 16.61              | -5.293           | 0.2278      | 4                | 4  | 32.86 | 12.00 |

**Table S9: Two-way ANOVA details for Figure S5 (whole mouse brain)**

|                                                   |                           |                       |                           |             |                  |    |          |       |
|---------------------------------------------------|---------------------------|-----------------------|---------------------------|-------------|------------------|----|----------|-------|
| Compare cell means regardless of rows and columns |                           |                       |                           |             |                  |    |          |       |
| Number of families                                | 1                         |                       |                           |             |                  |    |          |       |
| Number of comparisons per family                  | 15                        |                       |                           |             |                  |    |          |       |
| Alpha                                             | 0.05                      |                       |                           |             |                  |    |          |       |
| Šidák's multiple comparisons test                 | Predicted (LS) mean diff. | 95.00% CI of diff.    | Below threshold?          | Summary     | Adjusted P Value |    |          |       |
| CEdG:WT vs. CEdG:DJ-1 KO                          | -1.139                    | -2.117 to -0.1615     | Yes                       | *           | 0.0131           |    |          |       |
| CEdG:WT vs. CEG:WT                                | -0.8060                   | -1.827 to 0.2153      | No                        | ns          | 0.2318           |    |          |       |
| CEdG:WT vs. CEG:DJ-1 KO                           | -1.479                    | -2.457 to -0.5015     | Yes                       | ***         | 0.0007           |    |          |       |
| CEdG:WT vs. CEL:WT                                | 0.2712                    | -0.7502 to 1.292      | No                        | ns          | 0.9995           |    |          |       |
| CEdG:WT vs. CEL:DJ-1 KO                           | -1.137                    | -2.115 to -0.1596     | Yes                       | *           | 0.0133           |    |          |       |
| CEdG:DJ-1 KO vs. CEG:WT                           | 0.3333                    | -0.6445 to 1.311      | No                        | ns          | 0.9933           |    |          |       |
| CEdG:DJ-1 KO vs. CEG:DJ-1 KO                      | -0.3400                   | -1.272 to 0.5923      | No                        | ns          | 0.9872           |    |          |       |
| CEdG:DJ-1 KO vs. CEL:WT                           | 1.410                     | 0.4326 to 2.388       | Yes                       | **          | 0.0012           |    |          |       |
| CEdG:DJ-1 KO vs. CEL:DJ-1 KO                      | 0.001874                  | -0.9305 to 0.9342     | No                        | ns          | >0.9999          |    |          |       |
| CEG:WT vs. CEG:DJ-1 KO                            | -0.6733                   | -1.651 to 0.3045      | No                        | ns          | 0.4207           |    |          |       |
| CEG:WT vs. CEL:WT                                 | 1.077                     | 0.05582 to 2.098      | Yes                       | *           | 0.0324           |    |          |       |
| CEG:WT vs. CEL:DJ-1 KO                            | -0.3315                   | -1.309 to 0.6464      | No                        | ns          | 0.9936           |    |          |       |
| CEG:DJ-1 KO vs. CEL:WT                            | 1.750                     | 0.7726 to 2.728       | Yes                       | ****        | <0.0001          |    |          |       |
| CEG:DJ-1 KO vs. CEL:DJ-1 KO                       | 0.3419                    | -0.5905 to 1.274      | No                        | ns          | 0.9865           |    |          |       |
| CEL:WT vs. CEL:DJ-1 KO                            | -1.409                    | -2.386 to -0.4308     | Yes                       | **          | 0.0013           |    |          |       |
| Test details                                      | Predicted (LS) mean 1     | Predicted (LS) mean 2 | Predicted (LS) mean diff. | SE of diff. | N1               | N2 | t        | DF    |
| CEdG:WT vs. CEdG:DJ-1 KO                          | 1.854                     | 2.993                 | -1.139                    | 0.3046      | 5                | 6  | 3.740    | 27.00 |
| CEdG:WT vs. CEG:WT                                | 1.854                     | 2.660                 | -0.8060                   | 0.3182      | 5                | 5  | 2.533    | 27.00 |
| CEdG:WT vs. CEG:DJ-1 KO                           | 1.854                     | 3.333                 | -1.479                    | 0.3046      | 5                | 6  | 4.856    | 27.00 |
| CEdG:WT vs. CEL:WT                                | 1.854                     | 1.583                 | 0.2712                    | 0.3182      | 5                | 5  | 0.8522   | 27.00 |
| CEdG:WT vs. CEL:DJ-1 KO                           | 1.854                     | 2.991                 | -1.137                    | 0.3046      | 5                | 6  | 3.734    | 27.00 |
| CEdG:DJ-1 KO vs. CEG:WT                           | 2.993                     | 2.660                 | 0.3333                    | 0.3046      | 6                | 5  | 1.094    | 27.00 |
| CEdG:DJ-1 KO vs. CEG:DJ-1 KO                      | 2.993                     | 3.333                 | -0.3400                   | 0.2905      | 6                | 6  | 1.171    | 27.00 |
| CEdG:DJ-1 KO vs. CEL:WT                           | 2.993                     | 1.583                 | 1.410                     | 0.3046      | 6                | 5  | 4.630    | 27.00 |
| CEdG:DJ-1 KO vs. CEL:DJ-1 KO                      | 2.993                     | 2.991                 | 0.001874                  | 0.2905      | 6                | 6  | 0.006452 | 27.00 |
| CEG:WT vs. CEG:DJ-1 KO                            | 2.660                     | 3.333                 | -0.6733                   | 0.3046      | 5                | 6  | 2.210    | 27.00 |
| CEG:WT vs. CEL:WT                                 | 2.660                     | 1.583                 | 1.077                     | 0.3182      | 5                | 5  | 3.385    | 27.00 |
| CEG:WT vs. CEL:DJ-1 KO                            | 2.660                     | 2.991                 | -0.3315                   | 0.3046      | 5                | 6  | 1.088    | 27.00 |
| CEG:DJ-1 KO vs. CEL:WT                            | 3.333                     | 1.583                 | 1.750                     | 0.3046      | 6                | 5  | 5.746    | 27.00 |
| CEG:DJ-1 KO vs. CEL:DJ-1 KO                       | 3.333                     | 2.991                 | 0.3419                    | 0.2905      | 6                | 6  | 1.177    | 27.00 |
| CEL:WT vs. CEL:DJ-1 KO                            | 1.583                     | 2.991                 | -1.409                    | 0.3046      | 5                | 6  | 4.624    | 27.00 |

### **Supplemental References**

Gilbert, R. P. and Brandt, R. B. (1975) Spectrometric Determination of Methylglyoxal with 2,4-dinitrophenylhydrazine. *Analytical Chemistry* **47**, 2418-2422.
